# Supplementary material for: Visualizing subcellular changes in the NAD(H) pool size versus redox state using fluorescence lifetime imaging microscopy of NADH
Source: PubMed Central journal article supplement (PMC11004000; doi:10.1038/s42003-024-06123-7), 2024-04-09
Supplement: 42003_2024_6123_MOESM3_ESM.pdf [file 42003_2024_6123_MOESM3_ESM.pdf]

## Description of Additional Supplementary Files

**File name:** Supplementary Data

**Description:** The source data behind the graphs in the paper
